# Supplementary material for: Mathematical Model of Glucagon Kinetics for the Assessment of Insulin-Mediated Glucagon Inhibition During an Oral Glucose Tolerance Test
Source: PubMed Central journal article supplement (PMC8020816; doi:10.3389/fendo.2021.611147), 2021-03-22
Supplement: Image_1.pdf [file Image_1.pdf]

Supplementary Material

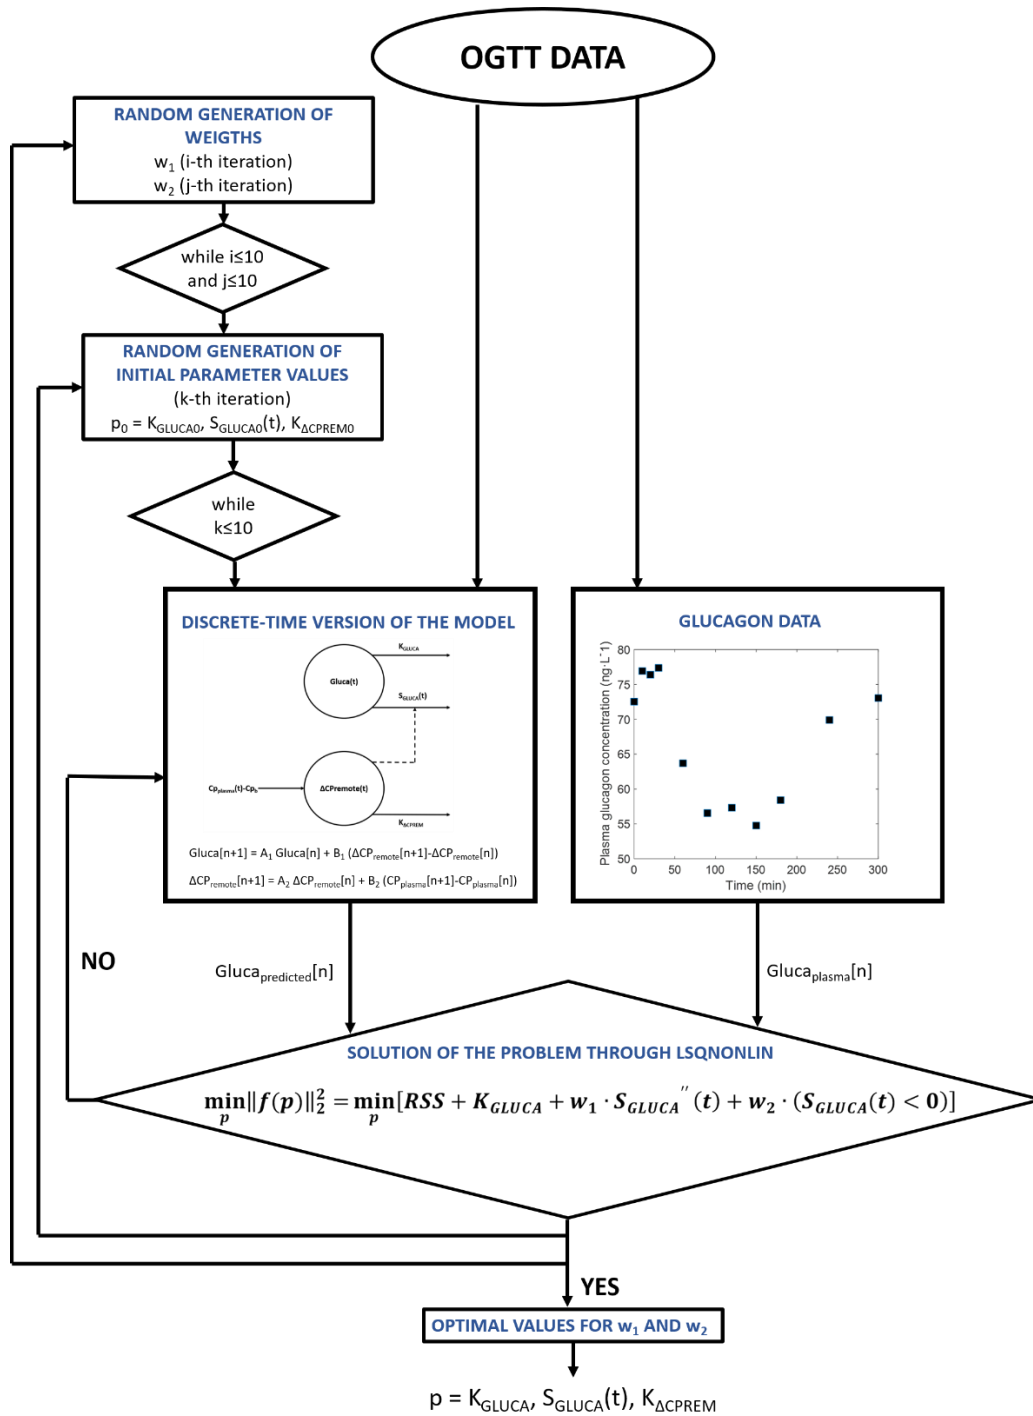

Supplementary Figure 1. Model implementation.
